# Supplementary material
Source: publisher figshare collection journal article supplement (https://karger.figshare.com/ndownloader/files/25650425)
Supplement: Supplementary file 1 [file 25650425]

Supplementary Table 1: Additional therapeutic interventions in 114 patients who received additional interventions after initial management

| **Intervention** | **Number (%)** |
| --- | --- |
| Surgeries | 38 (33.3) |
| Radioactive Iodine (I-131) | 41 (36) |
| Surgery + I-131 | 19 (16.7) |
| Surgery + external irradiation | 2 (1.75) |
| I-131 + external irradiation | 4 (3.5) |
| Surgery + I-131 + external irradiation | 6 (5.3) |
| Ethanol injection | 1 (0.9) |
| I-131+Ethanol injection | 2 (1.75) |
| I-131+ external irradiation + Ethanol Injection | 1 (0.9) |
| **Total** | 114 (100) |

Supplementary Table 2: ATA response to therapy status at first evaluation after initial management and at the last evaluation in 387 patients who did not have any additional therapeutic intervention

| **ATA status** | **At first evaluation***  **No. (%)** | **At last evaluation****  **No. (%)** | **Change** |
| --- | --- | --- | --- |
| ***Excellent response*** | 258 (66.7) | 357 (92.2) | Increased by 38% |
| ***Indeterminate response*** | 101 (26.1) | 4 (1.0) | Decreased by 96% |
| ***Biochemically incomplete*** | 17 (4.4) | 8 (2.1) | Decreased by 53% |
| ***Structurally incomplete*** | 11 (2.8) | 18 (4.6)^ | Increased by 63% |
| ***Total*** | 387 (100) | 387 (100) |  |

*Median duration from the time of I-131 ablation was 17 months, IQ range 14-22

**Median duration from time of I-131 ablation was 101 months, IQ range 71-126

^ including two patients who died secondary to DTC with a structurally incomplete disease

Supplementary Table 3: The ATA response to therapy status for 114 patients who had additional interventions at the first evaluation after initial management, just before any additional interventions and at the last evaluation

| ***ATA Status*** | ***At first evaluation***  ***No. (%)*** | ***Before any additional intervention, No. (%)*** | ***At last evaluation***  ***No. (%)*** |
| --- | --- | --- | --- |
| ***Excellent response*** | 5 (4.4) | 0 | 60 (52.6) |
| ***Indeterminate response*** | 24 (21.1) | 20 (17.5) | 1 (0.9) |
| ***Biochemically incomplete*** | 15 (13.2) | 25 (21.9) | 10 (9) |
| ***Structurally incomplete*** | 70 (61.4) | 69 (60.5) | 43 (37.7) |
| ***Total*** | 114 (100) | 114 (100) | 114 (100) |
